# Supplementary material for: Evolving Surgical Techniques and Improving Outcomes for Aortic Arch Surgery in Canada
Source: PubMed Central journal article supplement — CJC Open. 2021 May 12;3(9):1117–24. doi: 10.1016/j.cjco.2021.05.001 (PMC8531226; doi:10.1016/j.cjco.2021.05.001), 2021-05-12
Supplement: mmc1.pdf [file mmc1.pdf]

**Supplementary Material**

**Supplemental Table S1. In-hospital outcomes over the study period, 2008 to 2018.**

| <b>Year</b>                  | <b>2008</b>    | <b>2010</b>    | <b>2012</b>    | <b>2014</b>    | <b>2016</b>    | <b>2018</b>    | <b><i>Modeled linear regression P Value*</i></b> |
|------------------------------|----------------|----------------|----------------|----------------|----------------|----------------|--------------------------------------------------|
|                              | <b>(n=148)</b> | <b>(n=267)</b> | <b>(n=310)</b> | <b>(n=584)</b> | <b>(n=753)</b> | <b>(n=373)</b> |                                                  |
| <b>In-hospital Mortality</b> |                |                |                |                |                |                |                                                  |
| Overall                      | 20 (16)        | 28 (10)        | 33 (11)        | 43 (7.4)       | 54 (7.2)       | 23 (6.2)       | 0.001                                            |
| Elective                     | 5 (6.8)        | 8 (5.6)        | 11 (5.5)       | 14 (3.7)       | 13 (2.8)       | 3 (1.2)        | <.01                                             |
| Urgent/Emergent              | 17 (23)        | 20 (16)        | 22 (20)        | 29 (14)        | 41 (15)        | 20 (16)        | 0.15                                             |
| <b>Stroke</b>                |                |                |                |                |                |                |                                                  |
| Overall                      | 13 (10)        | 19 (7.1)       | 25 (8.1)       | 46 (7.9)       | 42 (5.6)       | 33 (8.9)       | 0.36                                             |
| Elective                     | 5 (6.8)        | 12 (8.3)       | 8 (4.0)        | 20 (5.2)       | 16 (3.4)       | 13 (5.3)       | 0.12                                             |
| Urgent/Emergent              | 11 (15)        | 7 (5.7)        | 17 (15)        | 26 (13)        | 26 (9.3)       | 20 (16)        | 0.49                                             |
| <b>MMOM</b>                  |                |                |                |                |                |                |                                                  |
| Overall                      | 52 (41)        | 91 (34)        | 111 (36)       | 167 (29)       | 180 (24)       | 98 (27)        | <.001                                            |
| Elective                     | 18 (24)        | 41 (28)        | 43 (22)        | 79 (21)        | 66 (14)        | 32 (13)        | <.001                                            |

|                        |         |          |          |          |          |          |       |
|------------------------|---------|----------|----------|----------|----------|----------|-------|
| Urgent/Emergent        | 41 (55) | 50 (41)  | 68 (62)  | 88 (44)  | 114 (41) | 66 (54)  | 0.96  |
| <b>Any Transfusion</b> |         |          |          |          |          |          |       |
| Overall                | 92 (72) | 194 (73) | 220 (71) | 365 (63) | 471 (63) | 204 (55) | <.001 |
| Elective               | 45 (61) | 96 (67)  | 123 (62) | 205 (54) | 235 (50) | 101 (41) | <.001 |
| Urgent/Emergent        | 63 (85) | 98 (80)  | 97 (88)  | 160 (79) | 236 (84) | 103 (83) | 0.06  |

Trends in in-hospital outcomes in 2435 patients who underwent aortic arch surgery with hypothermic circulatory arrest, between 2008 and 2018, in 12 institutions across Canada. Trend in time for binary, ordinal, categorical or continuous variables was assessed using mixed-effect regression models with random-effect for the center to account for the effect of individual centers. \*P value was obtained from a linear regression model using date of surgery as a continuous variable to assess a linear trend across the years from 2008 to 2018. Values are N (%). Any Transfusion: overall total transfusion rates, including pRBC, FFP, platelets and factor VII; MMOM: modified Society of Thoracic Surgeons–defined composite endpoint for major morbidity and operative mortality.
